# Supplementary material for: Synthesis of well-defined amphiphilic branched polyethylene-graft-poly (N-isopropylacrylamide) copolymers by coordination copolymerization in tandem with RAFT polymerization and their self-assembled vesicles
Source: Royal Society of Chemistry journal article supplement (doi:10.1039/c3py01289a), 2013-09-27
Supplement: c3py01289a.pdf [file c3py01289a.pdf]

## Supporting Information

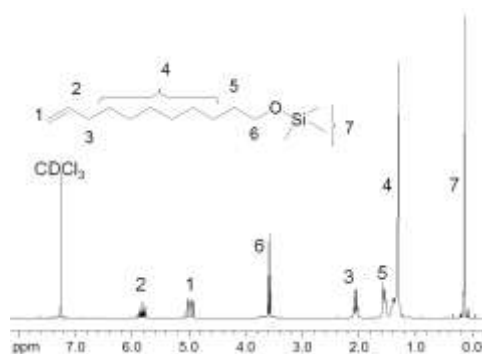

**Fig. S1**  $^1\text{H}$  NMR spectrum of  $\text{H}_2\text{C}=\text{CH}(\text{CH}_2)_9\text{-OSiMe}_3$ .

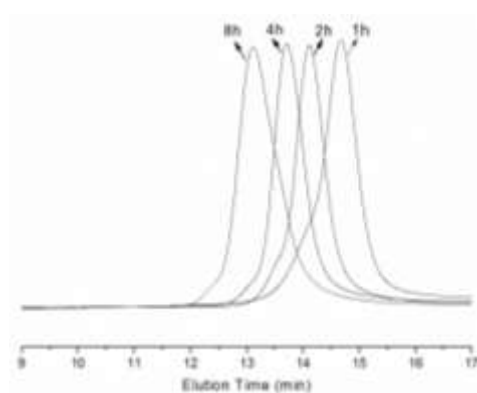

**Fig. S2** GPC elution curves of poly(ethylene-co-10-undecen-1-ol)s obtained at different times (EU1, EU4, EU5 and EU6 in Table 1).

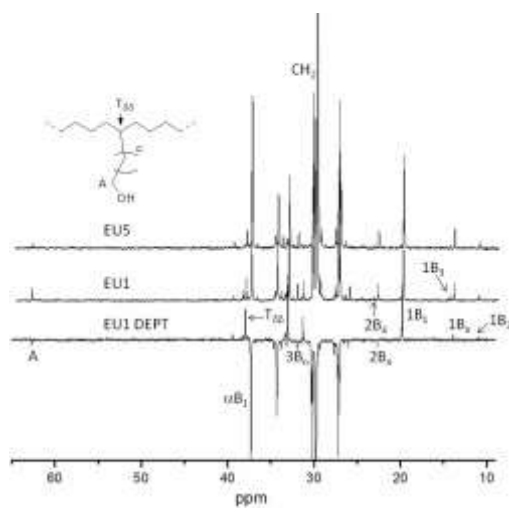

**Fig. S3.**  $^{13}\text{C}$  NMR and DEPT spectra of the poly(ethylene-co-10-undecen-1-ol)s (EU1, EU5 in Table 1).

**Table S1** Main Chemical shifts and assignments of  $^{13}\text{C}$  NMR.<sup>1,2</sup>

| Chemical shift (ppm) | Assignment                             |
|----------------------|----------------------------------------|
| 11.10                | 1B <sub>2</sub>                        |
| 14.12                | 1B <sub>n</sub>                        |
| 14.65                | 1B <sub>3</sub>                        |
| 20.04                | 1B <sub>1</sub>                        |
| 22.92                | 2B <sub>n</sub>                        |
| 23.37                | 2B <sub>4</sub>                        |
| 32.23                | 3B <sub>n</sub>                        |
| 37.29                | $\alpha\text{B}_1$                     |
| 38.11                | T <sub><math>\delta\delta</math></sub> |

**Scheme S1** Microstructure unit of incorporation of 10-undecen-1-ol in PE chain<sup>4-6</sup>

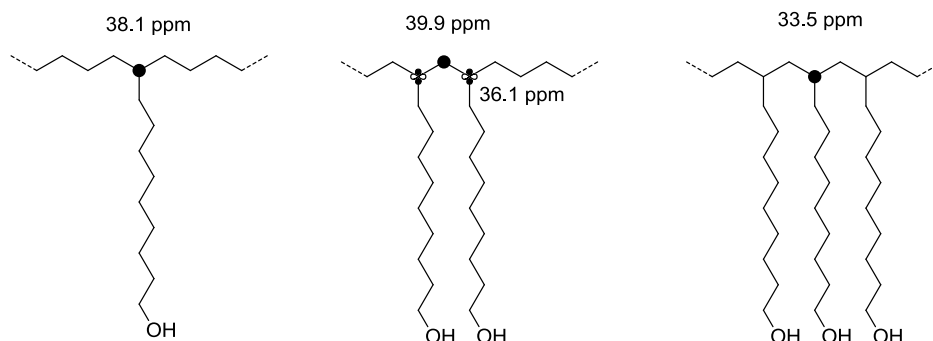

## References

- 1 Galland, G. B.; de Souza, R. F.; Mauler, R. S.; Nunes, F. F. *Macromolecules*, 1999, **32**, 1620.
- 2 Kunrath, F. A.; Monta, E. F.; Casagrande, O. L.; Mauler, R. S.; de Souza, R. F. *Macromol. Chem. Phys.*, 2002, **203**, 2407.

- 3 Carone, C. L. P.; Crossetti, G. L.; Basso, N. R. S.; Moraes, A. G. O.; Dos Santos, J. H. Z.; Bisatto, R.; Galland, G. B. *J. Polym. Sci., Part A: Polym. Chem.* 2007, **45**, 5199.
- 4 Xu, B. C.; Hu, T.; Wu, J. Q.; Hu, N. H.; Li, Y. S. *Dalton Trans.* 2009, 41, 8854.
- 5 Imuta, J.; Toda Y.; Kashiwa, N. *Chem. Lett.* 2001, **7**, 710.
- 6 Kashiwa, N.; Matsugi, T.; Kojoh, S.; Kaneko, H.; Kawahara, N.; Matsuo, S.; Nobori, T.; Imuta, J. *J. Polym. Sci., Part A: Polym. Chem.* 2003, **41**, 3657.
